# Supplementary material for: Recycling of cell surface membrane proteins from yeast endosomes is regulated by ubiquitinated Ist1
Source: PubMed Central journal article supplement (PMC9491851; doi:10.1083/jcb.202109137), 2022-09-20

Figure 6C

WT Ist1  $\Delta$  Ist1-HA-LINKER-HIS6

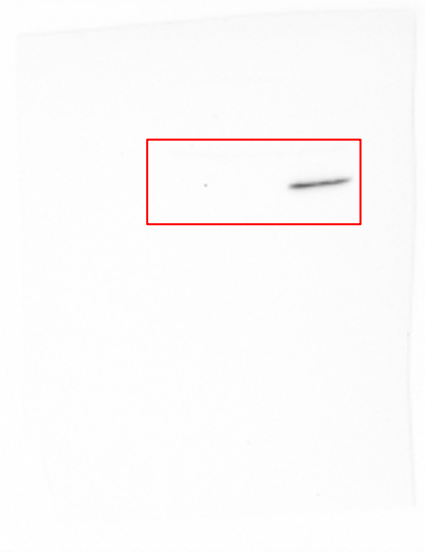

Anti-HA

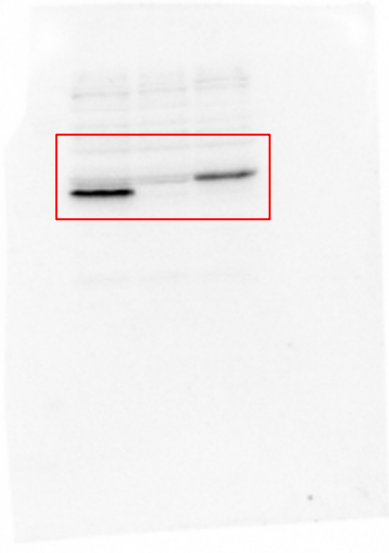

Anti-Ist1

WT Ist1  $\Delta$  Ist1-HA-LINKER-HIS6

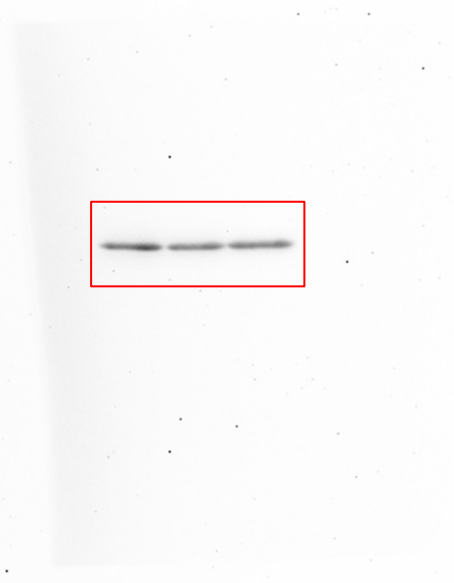

Anti-GAPDH

Ponceau S

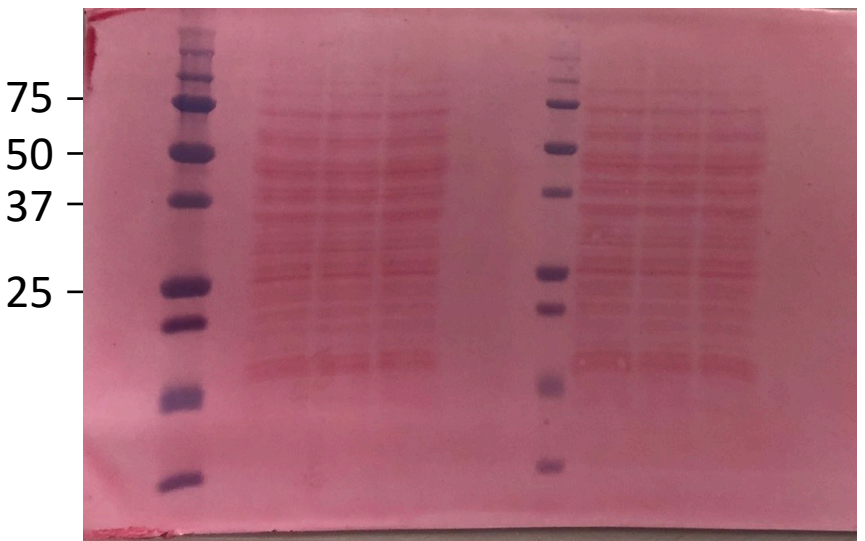

Anti-HA

Anti-Ist1

Anti-GAPDH

Figure 6D

WT (minus His tag)  
Ist1-HA-His<sub>6</sub>

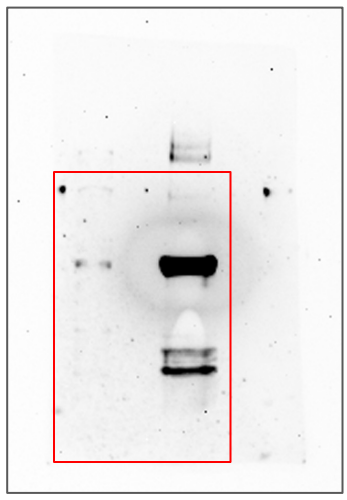

Anti Ist1

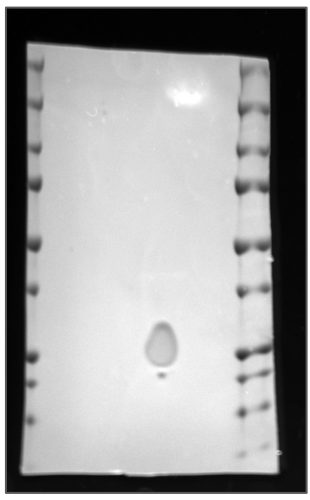

kDa

75  
50  
37  
25

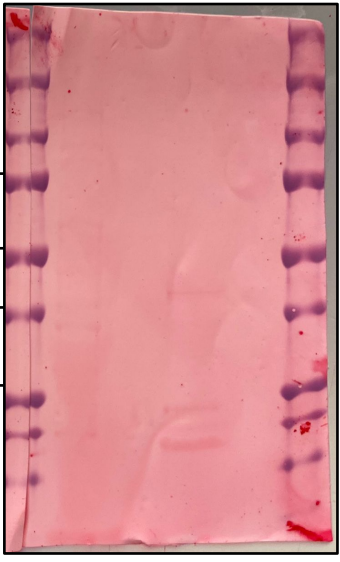

Ponceau S

Whole cell lysate

Elution

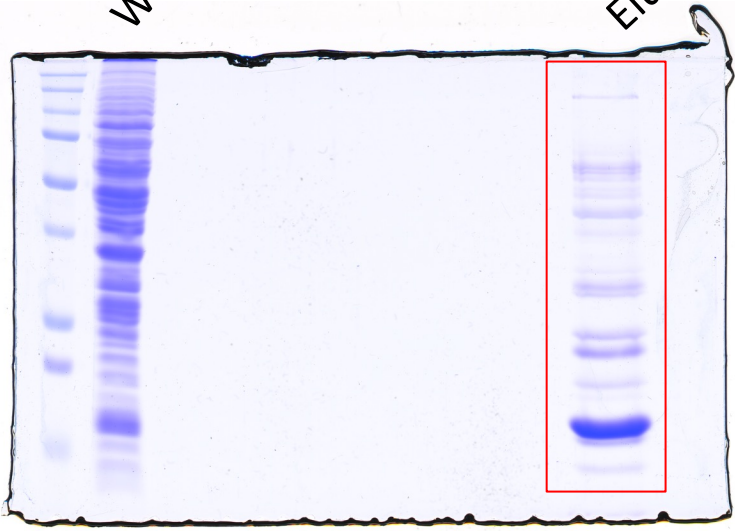

Figure 6H

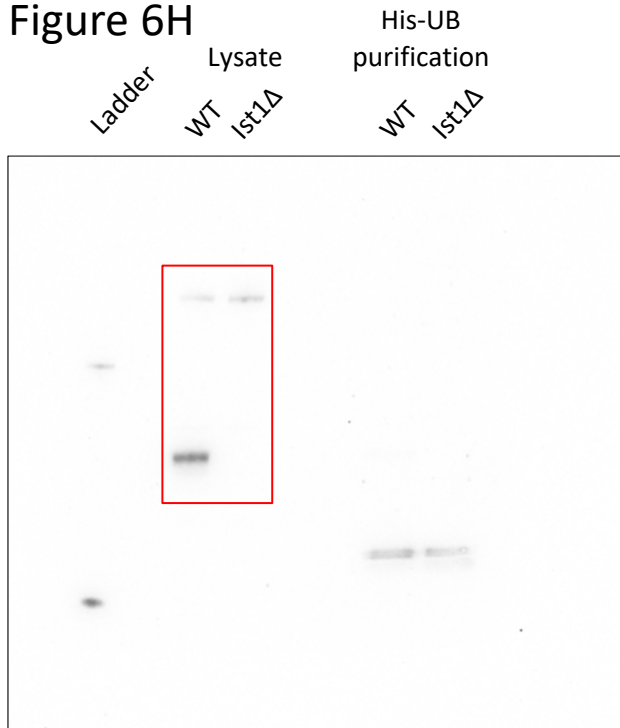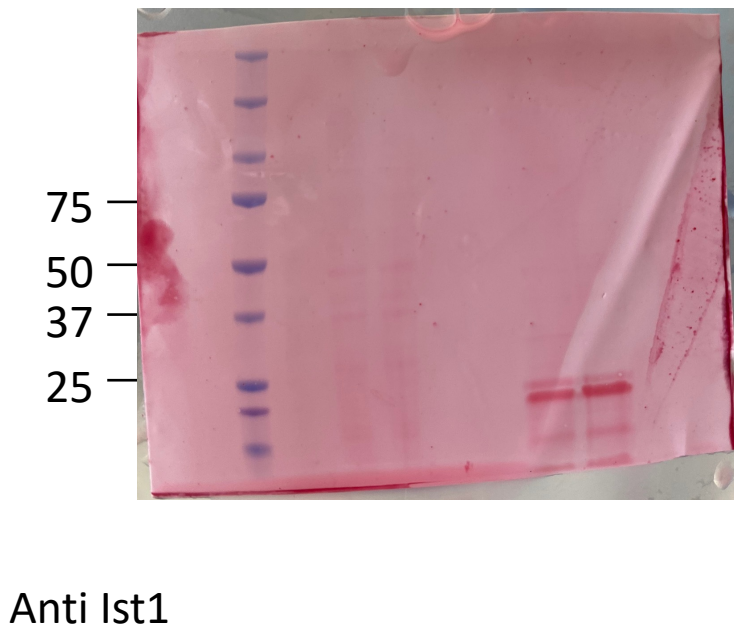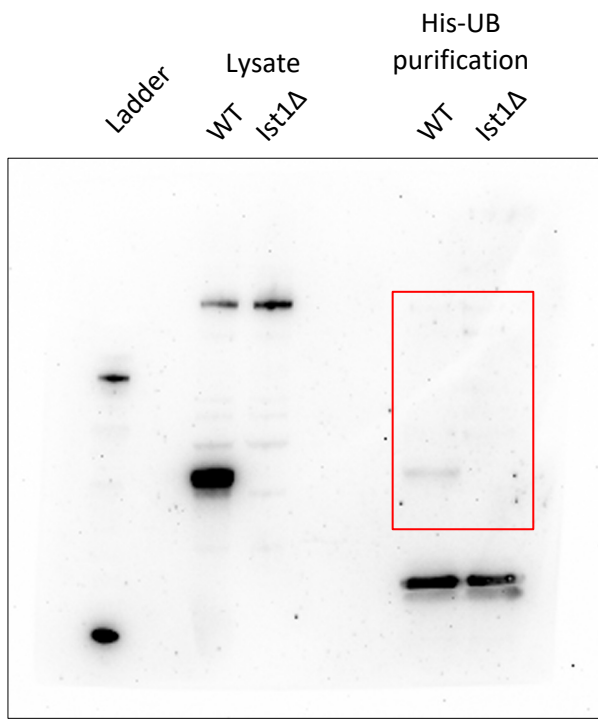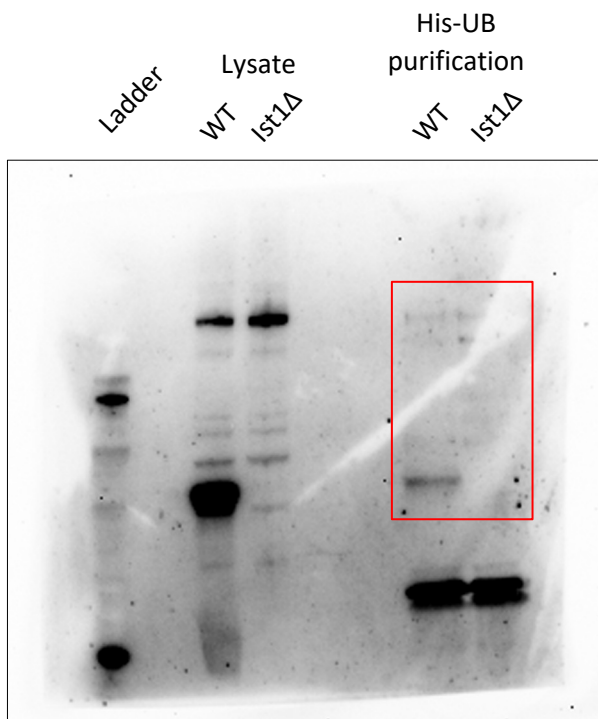

Anti Ist1

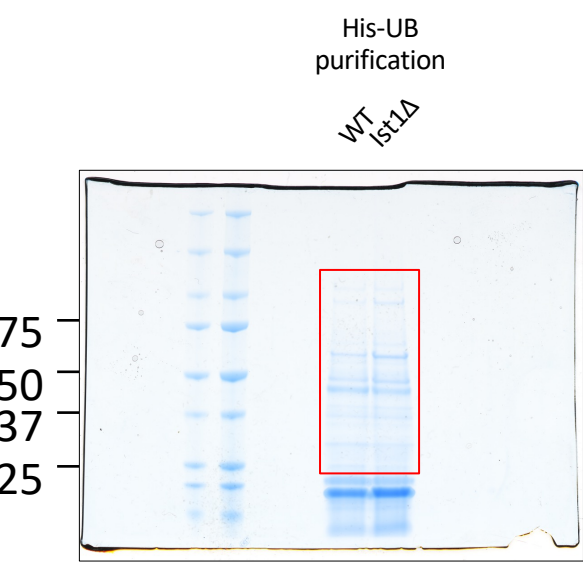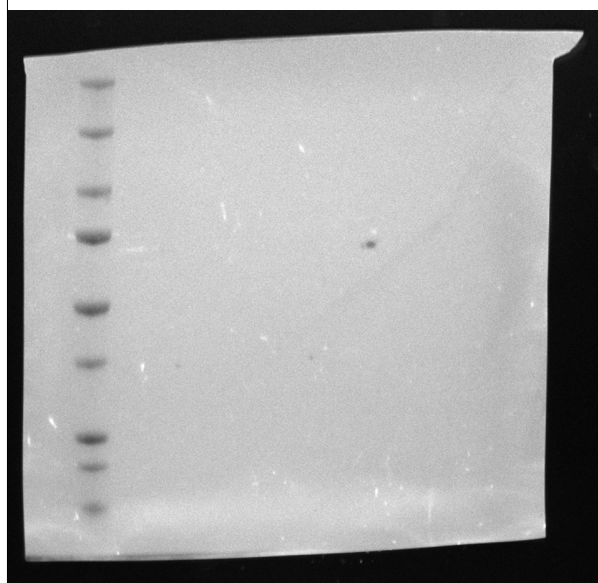

Supplement: JCB_202109137_SourceDataF6.pdf [file JCB_202109137_SourceDataF6.pdf]
