# Supplementary material for: Recycling of cell surface membrane proteins from yeast endosomes is regulated by ubiquitinated Ist1
Source: PubMed Central journal article supplement (PMC9491851; doi:10.1083/jcb.202109137), 2022-09-20

Figure 7A

*ist1* $\Delta$  + Ist1-HA  
*ist1* $\Delta$  + Ist1<sup>KR</sup>-HA  
Wild-type  
*ist1* $\Delta$

kDa

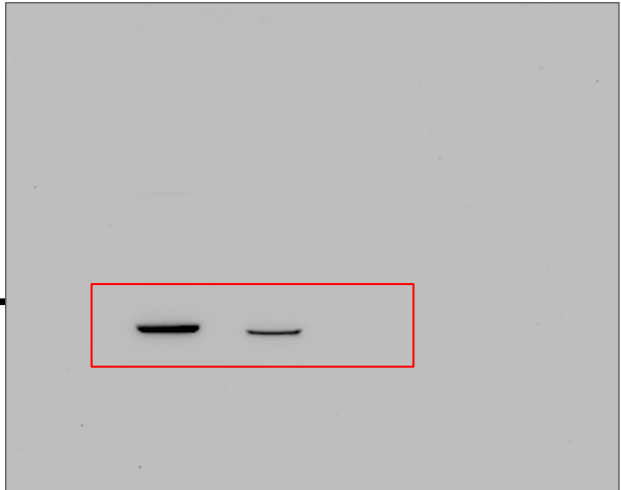

$\alpha$ -HA

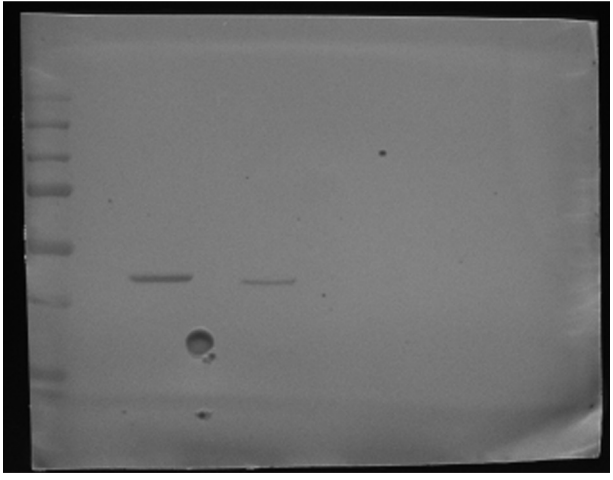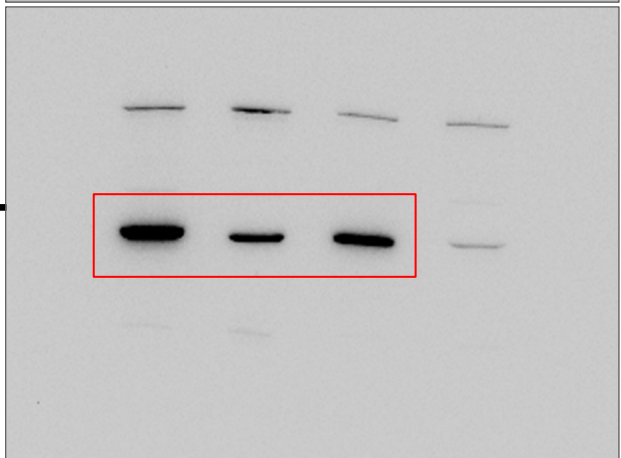

$\alpha$ -Ist1

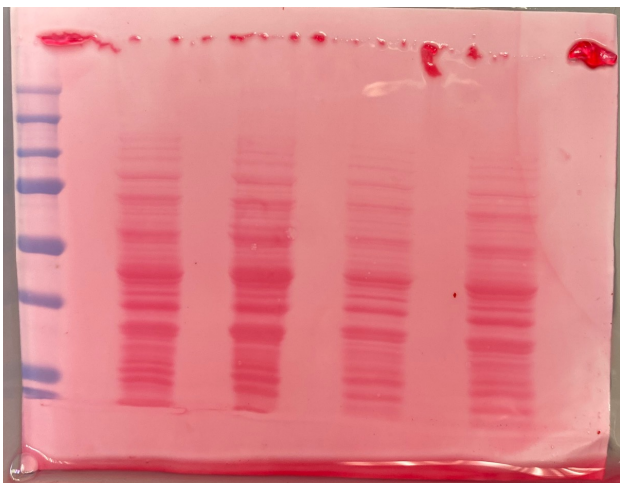

Ponceau S

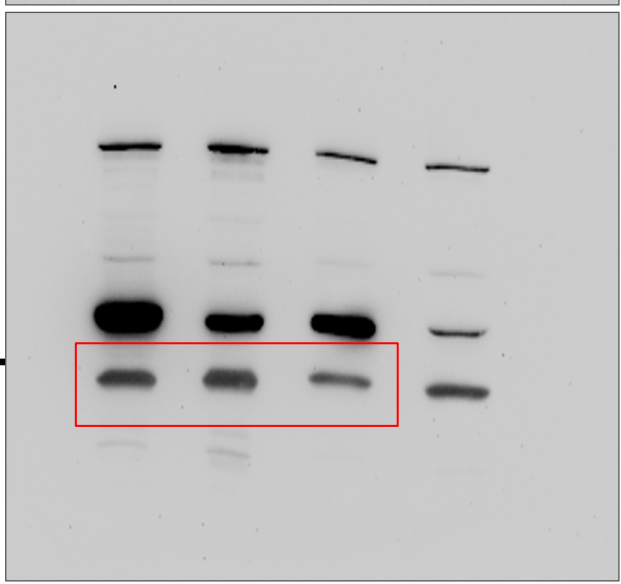

$\alpha$ -GAPDH

Figure 7B

Ist1-HA

Ist1KR-HA

0 1 2

0 1 2

Time (hr) Cyhx [25mg/L]

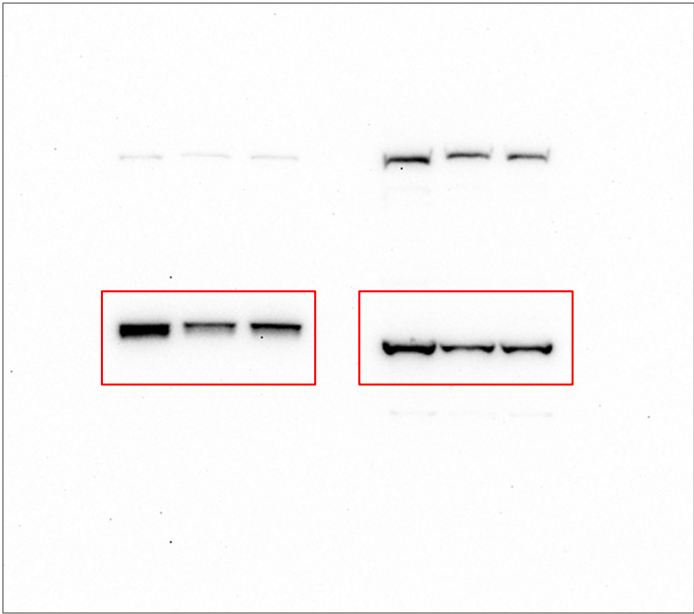

Anti-Ist1

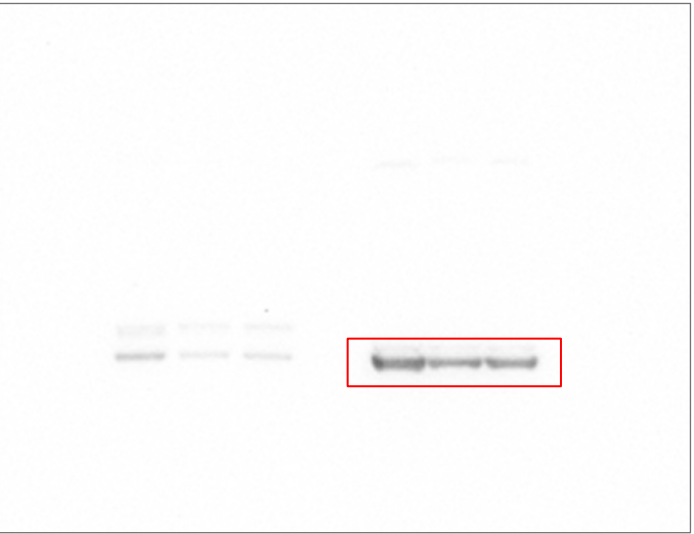

Anti-GAPDH

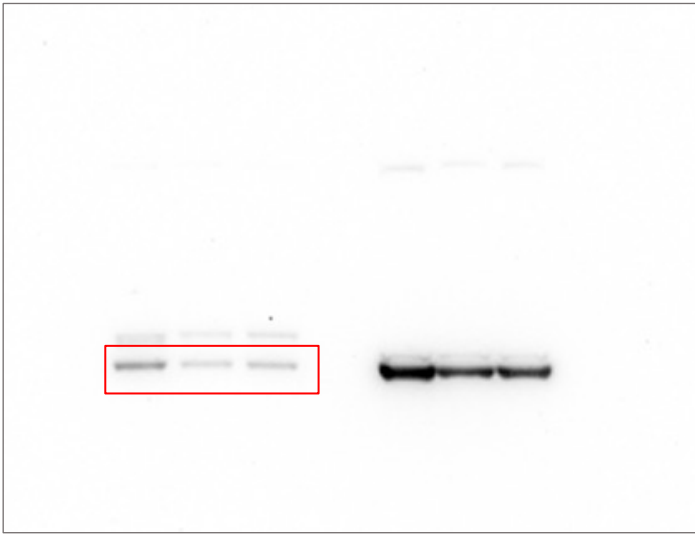

Ponceau S

70  
50  
40  
35

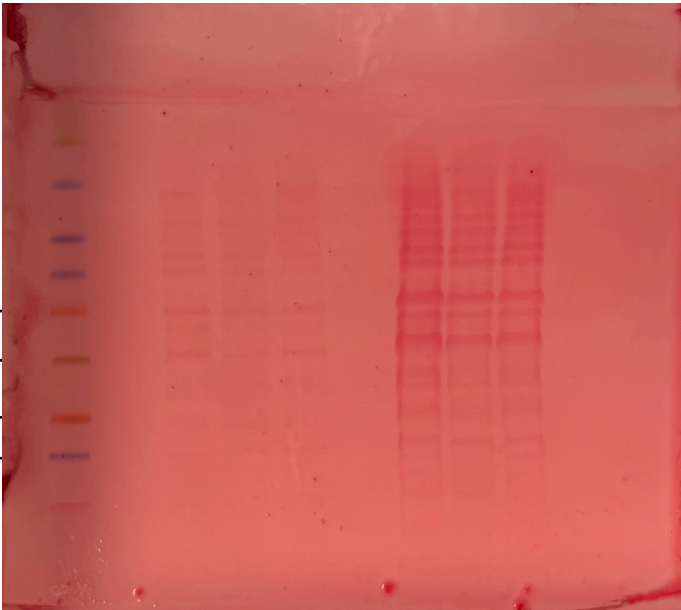

Supplement: JCB_202109137_SourceDataF7.pdf [file JCB_202109137_SourceDataF7.pdf]
