# Supplementary material for: Recycling of cell surface membrane proteins from yeast endosomes is regulated by ubiquitinated Ist1
Source: PubMed Central journal article supplement (PMC9491851; doi:10.1083/jcb.202109137), 2022-09-20

Figure 8B  
IST1<sup>WT</sup>

YETI-IST1

kDa      Ist1<sup>WT</sup>    0    0.1    0.3    0.4    0.5    1    2    5    10    E2 [nM]

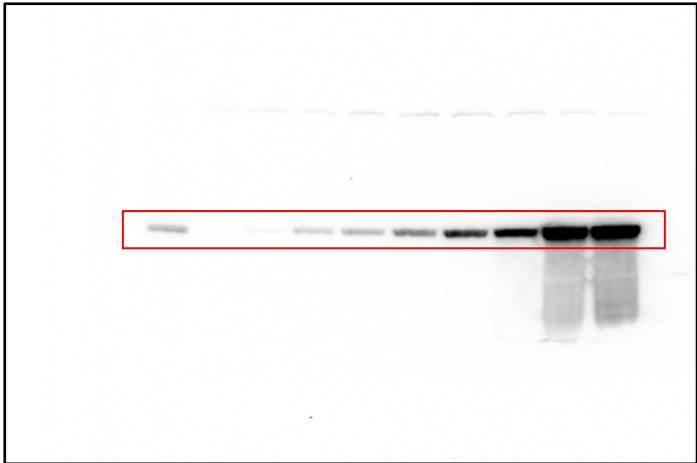

Anti-Ist1

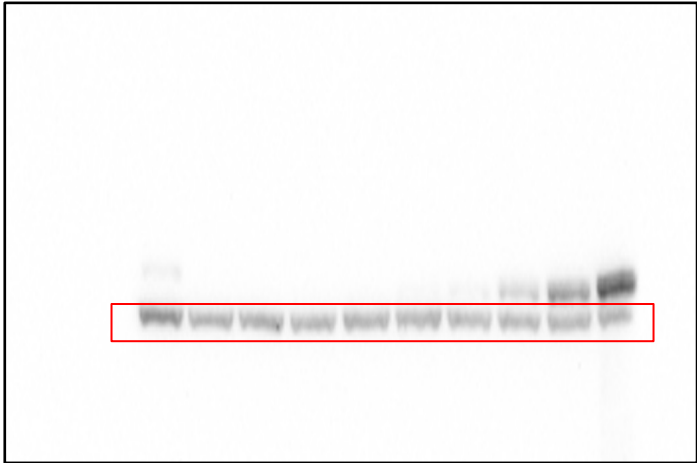

Anti-GAPDH

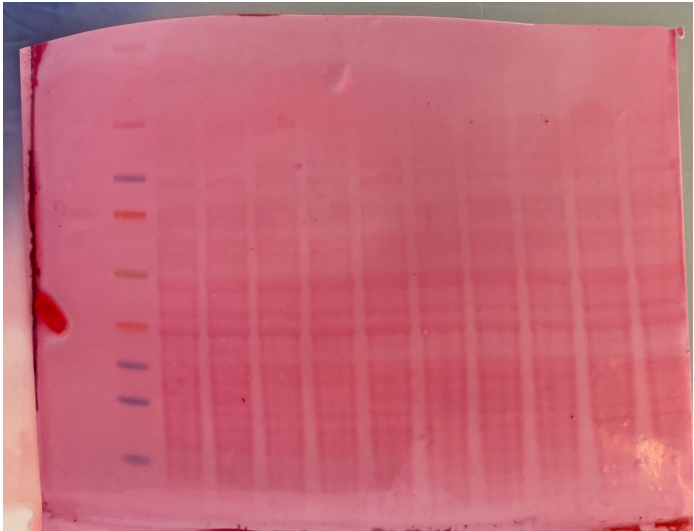

Ponceau S

Figure 8B  
IST<sup>KR</sup>

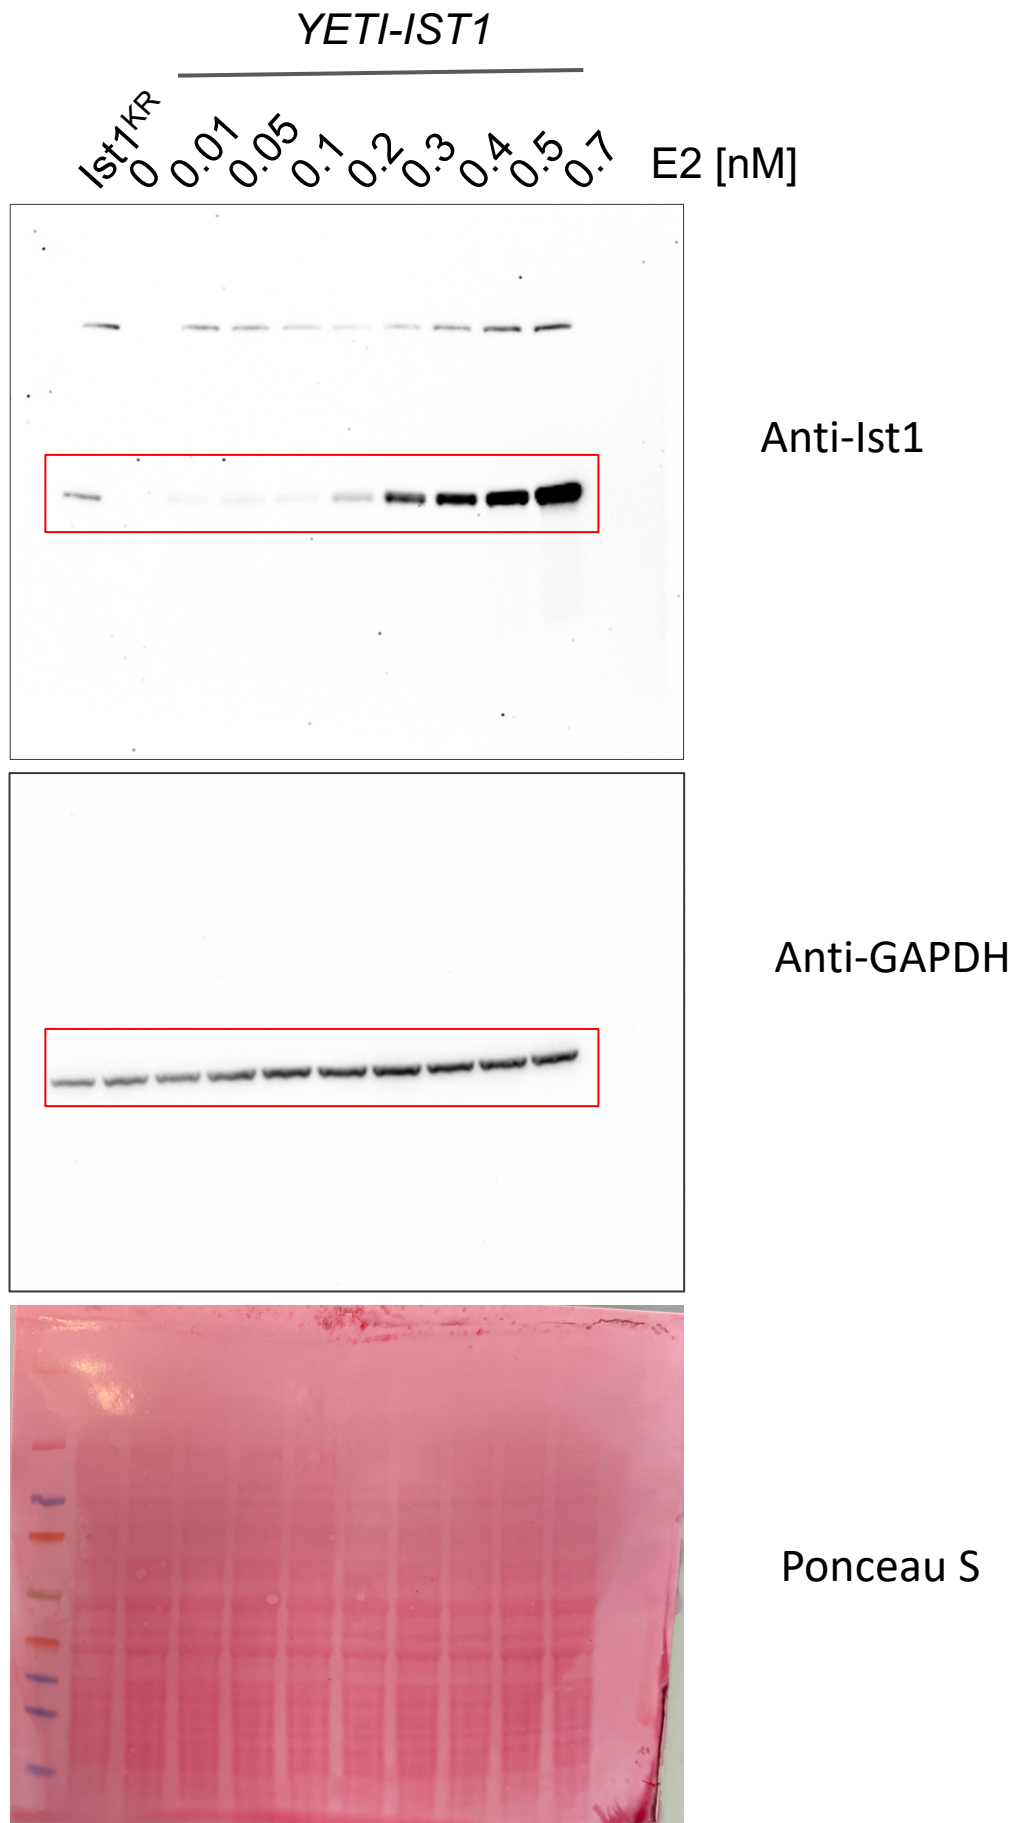

Supplement: JCB_202109137_SourceDataF8.pdf [file JCB_202109137_SourceDataF8.pdf]
